# Supplementary material
Source: Springer Nature journal article supplement (https://www.springermedizin.de/resource/supplementary/12913_2013_2763_MOESM2_ESM.pdf/9531372)

# Circle of Care

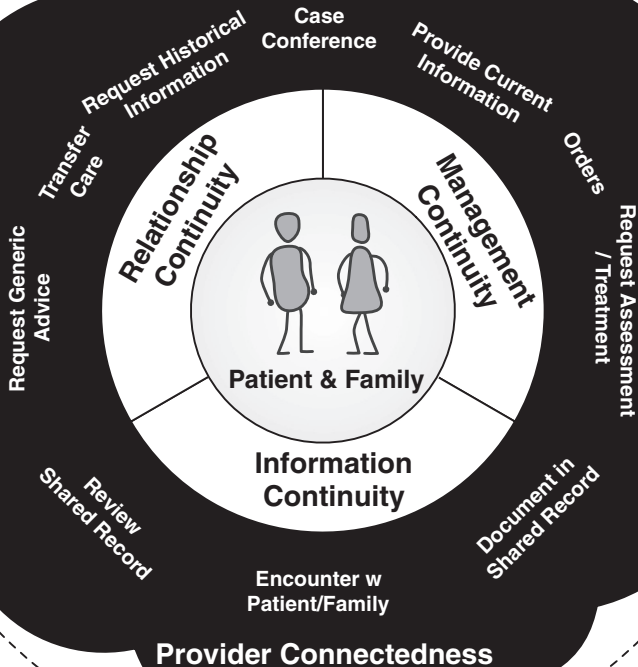

**Environmental Context**

Supplement: MOESM2 [file 9531372]
